# Supplementary material
Source: MDPI journal article supplement (https://www.mdpi.com/2073-4441/3/4/1005)
Supplement: s1 [file s1]

**Table S2.** Summary of experimental studies on the effects of ocean acidification on marine organisms.

| Treatment (pH)                          |     |     |     |     |     |     |                 |     |     |                 |     |     |         | Study- Author/ Species/ Stage |     |     |     |                                                              |
|-----------------------------------------|-----|-----|-----|-----|-----|-----|-----------------|-----|-----|-----------------|-----|-----|---------|-------------------------------|-----|-----|-----|--------------------------------------------------------------|
| 6.0                                     | 6.5 | 6.8 | 6.9 | 7.0 | 7.1 | 7.2 | 7.3             | 7.4 | 7.5 | 7.6             | 7.7 | 7.8 | 7.9     |                               | 8.0 | 8.1 | 8.2 |                                                              |
|                                         |     |     |     |     |     |     | ←Predicted 2300 |     |     | ←Predicted 2100 |     |     | Control |                               |     |     |     |                                                              |
| <b>Echinoderms (Larval development)</b> |     |     |     |     |     |     |                 |     |     |                 |     |     |         |                               |     |     |     |                                                              |
|                                         |     |     |     |     |     |     |                 |     |     |                 |     |     |         |                               |     |     |     | Kurihara & Shirayama [52]— <i>Hemicentrotus pulcherrimus</i> |
|                                         |     |     |     | ▲   |     |     |                 |     |     |                 |     |     |         |                               |     |     |     | • Development of pluteus                                     |
|                                         |     |     |     | ▲   |     |     |                 |     |     |                 |     |     |         |                               |     |     |     | Kurihara <i>et al.</i> [53]                                  |
|                                         |     |     |     |     |     |     |                 |     |     |                 |     |     |         |                               |     |     |     | • Size— <i>Hemicentrotus pulcherrimus</i>                    |
|                                         |     |     |     |     | ▲   |     |                 |     |     |                 |     |     |         |                               |     |     |     | • Size— <i>Echinometra mathaei</i>                           |
|                                         |     |     |     |     | ▲   |     |                 |     |     |                 |     |     |         |                               |     |     |     | Dupont <i>et al.</i> [61]— <i>Ophiothrix fragilis</i>        |
|                                         |     |     |     |     |     |     |                 |     |     |                 |     |     |         |                               |     |     |     | • Survival                                                   |
|                                         |     |     |     |     |     |     |                 |     |     |                 |     |     |         |                               |     |     |     | • Body rod length from day 2                                 |
|                                         |     |     |     |     |     |     |                 |     |     |                 |     |     |         |                               |     |     |     | • Asymmetry from day 2                                       |
|                                         |     |     |     |     |     |     |                 |     |     |                 |     |     |         |                               |     |     |     | • Development                                                |
|                                         |     |     |     |     |     |     |                 |     |     |                 |     |     |         |                               |     |     |     | Dupont <i>et al.</i> [32]— <i>Crossaster papposus</i>        |
|                                         |     |     |     |     |     |     |                 |     |     |                 |     |     |         |                               |     |     |     | • Increased growth & development rates                       |
|                                         |     |     |     |     |     |     |                 |     |     |                 |     |     |         |                               |     |     |     | • Survival                                                   |
|                                         |     |     |     |     |     |     |                 |     |     |                 |     |     |         |                               |     |     |     | • Skeletogenesis                                             |
|                                         |     |     |     |     |     |     |                 |     |     |                 |     |     |         |                               |     |     |     | Clark <i>et al.</i> [60]—4 sea urchins                       |
|                                         |     |     |     |     |     |     |                 |     |     |                 |     |     |         |                               |     |     |     | • <i>Sterechinus neumayeri</i> (Antartica) 7 days            |
| ▲                                       |     |     |     |     |     |     |                 |     |     |                 |     |     |         |                               |     |     |     | • <i>Evechinus chloroticus</i> (New Zealand) 9–13 days       |
| ▲                                       |     |     |     |     |     |     |                 |     |     |                 |     |     |         |                               |     |     |     | • <i>Pseudechinus huttoni</i> (New Zealand)                  |
| ▲                                       |     |     |     |     |     |     |                 |     |     |                 |     |     |         |                               |     |     |     | • <i>Tripneustes gratilla</i> (Cook Is, tropical)            |
| ▲                                       |     |     |     |     |     |     |                 |     |     |                 |     |     |         |                               |     |     |     | Ericson <i>et al.</i> [54]— <i>Sterechinus neumayeri</i>     |
|                                         |     |     |     |     |     |     |                 |     |     |                 |     |     |         |                               |     |     |     | • Day 1–2 Cleavage, abnormal embryos, or coeloblastula       |

Table S2. Cont.

| Treatment (pH)                          |     |     |     |     |     |     |                 |     |     |                 |     |     |         | Study- Author/ Species/ Stage |     |     |                                                                                                                                                                          |
|-----------------------------------------|-----|-----|-----|-----|-----|-----|-----------------|-----|-----|-----------------|-----|-----|---------|-------------------------------|-----|-----|--------------------------------------------------------------------------------------------------------------------------------------------------------------------------|
| 6.0                                     | 6.5 | 6.8 | 6.9 | 7.0 | 7.1 | 7.2 | 7.3             | 7.4 | 7.5 | 7.6             | 7.7 | 7.8 | 7.9     |                               | 8.0 | 8.1 | 8.2                                                                                                                                                                      |
|                                         |     |     |     |     |     |     | ←Predicted 2300 |     |     | ←Predicted 2100 |     |     | Control |                               |     |     |                                                                                                                                                                          |
| <b>Echinoderms (Larval development)</b> |     |     |     |     |     |     |                 |     |     |                 |     |     |         |                               |     |     |                                                                                                                                                                          |
|                                         |     |     |     | ▲   |     |     | ns              |     |     |                 | ns  |     |         | ●                             |     |     | <ul style="list-style-type: none"> <li>• Day 6 abnormal and size</li> </ul> Byrne <i>et al.</i> [34]— <i>Heliocidaris erythrogramma</i>                                  |
|                                         |     |     |     |     |     |     |                 |     |     | ns              |     | ns  |         |                               |     | ●   | <ul style="list-style-type: none"> <li>• Cleavage</li> </ul> Byrne <i>et al.</i> [120]— <i>Heliocidaris erythrogramma</i>                                                |
|                                         |     |     |     |     |     |     |                 |     |     | ▲               |     | ▲   |         |                               |     | ●   | <ul style="list-style-type: none"> <li>• Calcification</li> </ul>                                                                                                        |
|                                         |     |     |     |     |     |     |                 |     |     | ▲               |     | ▲   |         |                               |     | ●   | <ul style="list-style-type: none"> <li>• Development</li> </ul>                                                                                                          |
|                                         |     |     |     |     |     |     |                 |     |     | ▲               |     | ▲   |         |                               |     | ●   | <ul style="list-style-type: none"> <li>• Spine formation</li> </ul> Sheppard Brennand <i>et al.</i> [45]— <i>Tripneustes gratila</i>                                     |
|                                         |     |     |     |     |     |     |                 |     |     | ▲               |     | ▲   |         |                               |     | ●   | <ul style="list-style-type: none"> <li>• Growth</li> </ul> O'Donnell <i>et al.</i> [79]— <i>Strongylocentrotus franciscanus</i>                                          |
|                                         |     |     |     |     |     |     |                 |     |     |                 |     |     | ▲       | ●                             |     |     | <ul style="list-style-type: none"> <li>• Changed gene expression profile heat stress gene <i>hsp70</i></li> </ul> O'Donnell <i>et al.</i> [80]— <i>Lytechinus pictus</i> |
|                                         |     |     |     |     |     |     |                 |     |     |                 |     | ▲   | ●       |                               |     |     | <ul style="list-style-type: none"> <li>• Size, arm length, shape</li> </ul>                                                                                              |
|                                         |     |     |     |     |     |     |                 |     |     |                 |     | ▲   | ●       |                               |     |     | <ul style="list-style-type: none"> <li>• Gene expression: biomineralization, skeletogenesis, energy metabolism,</li> </ul>                                               |
|                                         |     |     |     |     |     |     |                 |     |     |                 |     | ++▲ | ●       |                               |     |     | <ul style="list-style-type: none"> <li>• Gene expression: some acid-base, ion regulation</li> </ul> Moulin <i>et al.</i> [42]— <i>Paracentrotus lividus</i>              |
|                                         |     | ▲   |     | ▲   |     | ▲   |                 | ▲   |     | ▲               |     | ns  |         | ●                             |     |     | <ul style="list-style-type: none"> <li>• Cleavage</li> </ul>                                                                                                             |
|                                         |     | ▲   |     | ▲   |     | ▲   |                 | ns  |     | ns              |     | ns  |         | ●                             |     |     | <ul style="list-style-type: none"> <li>• Rod size</li> </ul>                                                                                                             |
|                                         |     | ▲   |     | ▲   |     | ▲   |                 | ▲   |     | ns              |     | ns  |         | ●                             |     |     | <ul style="list-style-type: none"> <li>• Abnormality</li> </ul> Martin <i>et al.</i> [121]— <i>Paracentrotus lividus</i>                                                 |
|                                         |     |     |     | ▲   |     |     |                 |     |     |                 |     |     |         |                               | ●   |     | <ul style="list-style-type: none"> <li>• Delayed pluteus development</li> </ul>                                                                                          |

Table S2. Cont.

| Treatment (pH)                          |     |     |     |     |     |     |                  |     |     |     |         |     |      | Study- Author/ Species/ Stage |     |     |                                                                 |
|-----------------------------------------|-----|-----|-----|-----|-----|-----|------------------|-----|-----|-----|---------|-----|------|-------------------------------|-----|-----|-----------------------------------------------------------------|
| 6.0                                     | 6.5 | 6.8 | 6.9 | 7.0 | 7.1 | 7.2 | 7.3              | 7.4 | 7.5 | 7.6 | 7.7     | 7.8 | 7.9  |                               | 8.0 | 8.1 | 8.2                                                             |
| ← Predicted 2300                        |     |     |     |     |     |     | ← Predicted 2100 |     |     |     | Control |     |      |                               |     |     |                                                                 |
| <b>Echinoderms (Larval development)</b> |     |     |     |     |     |     |                  |     |     |     |         |     |      |                               |     |     |                                                                 |
| ▲                                       | ▲   | ▲   |     |     |     |     |                  |     |     |     |         |     |      |                               | ●   |     | • Morphology                                                    |
| ▲                                       | ▲   | ▲   | ▲   | ▲   |     |     |                  |     |     |     |         |     |      |                               | ●   |     | • Post-oral and antero-lateral arm length                       |
| ▲                                       | ▲   | ▲   | ▲   | ▲   | ▲   | ▲   | ▲                | ▲   | ▲   | ▲   | ▲       | ▲   |      |                               | ●   |     | • Rod size                                                      |
|                                         |     |     | ++▲ | ++▲ | ++▲ | ++▲ | ++▲              | ++▲ |     |     |         |     |      |                               | ●   |     | • Protein and biomineralization genes                           |
|                                         |     |     |     |     |     |     |                  |     | ns  |     |         |     |      |                               | ●   |     | Yu <i>et al.</i> [122]— <i>Strongylocentrotus purpuratus</i>    |
|                                         |     |     |     |     |     |     |                  |     | ns  |     |         |     |      |                               | ●   |     | • Development                                                   |
|                                         |     |     |     |     |     |     |                  |     | ▲   |     |         |     |      |                               | ●   |     | • Size                                                          |
|                                         |     |     |     |     |     |     |                  |     |     |     |         |     |      |                               | ●   |     | Stumpp <i>et al.</i> [83]— <i>Strongylocentrotus purpuratus</i> |
|                                         |     |     |     |     |     |     |                  |     |     |     |         |     |      |                               | ●   |     | • Scope for growth and development                              |
|                                         |     |     |     |     |     |     |                  |     |     |     |         |     |      |                               | ●   |     | Stumpp <i>et al.</i> [82]— <i>Strongylocentrotus purpuratus</i> |
|                                         |     |     |     |     |     |     |                  |     |     |     |         |     |      |                               | ●   |     | • Genes, ATP synthase regulation                                |
|                                         |     |     |     |     |     |     |                  |     |     |     |         |     |      |                               | ●   |     | • Genes, calcification                                          |
| <b>Molluscs (Development)</b>           |     |     |     |     |     |     |                  |     |     |     |         |     |      |                               |     |     |                                                                 |
|                                         |     |     |     |     |     |     |                  |     |     |     |         |     |      |                               |     |     | Zippay & Hofmann [74]— <i>Haliotis rufescens</i>                |
|                                         |     |     |     |     |     |     |                  |     |     |     |         |     | ▲ ns | ●                             |     |     | • Thermal tolerance varied with development stage               |
|                                         |     |     |     |     |     |     |                  |     |     |     |         |     | ns   | ●                             |     |     | • Gene expression <i>ap24</i> , <i>engrailed</i> genes          |
|                                         |     |     |     |     |     |     |                  |     |     |     |         |     |      |                               |     |     | Byrne <i>et al.</i> [120]— <i>Haliotis coccoradiata</i>         |
|                                         |     |     |     |     |     |     |                  | ▲   |     |     |         |     |      |                               | ●   |     | • Calcification                                                 |
|                                         |     |     |     |     |     |     |                  | ▲   |     |     |         |     |      |                               | ●   |     | • Development                                                   |

Table S2. Cont.

| Treatment (pH)                |     |     |     |     |     |     |                 |     |     |     |         |     |     | Study- Author/ Species/ Stage |     |     |                                                                                                                         |
|-------------------------------|-----|-----|-----|-----|-----|-----|-----------------|-----|-----|-----|---------|-----|-----|-------------------------------|-----|-----|-------------------------------------------------------------------------------------------------------------------------|
| 6.0                           | 6.5 | 6.8 | 6.9 | 7.0 | 7.1 | 7.2 | 7.3             | 7.4 | 7.5 | 7.6 | 7.7     | 7.8 | 7.9 |                               | 8.0 | 8.1 | 8.2                                                                                                                     |
| ←Predicted 2300               |     |     |     |     |     |     | ←Predicted 2100 |     |     |     | Control |     |     |                               |     |     |                                                                                                                         |
| <b>Molluscs (Development)</b> |     |     |     |     |     |     |                 |     |     |     |         |     |     |                               |     |     |                                                                                                                         |
|                               |     |     |     |     |     |     |                 |     |     | ▲   |         | ▲   |     |                               | ●   |     | <ul style="list-style-type: none"> <li>Abnormal</li> </ul> Crim <i>et al.</i> [123]— <i>Haliotis kamschatkana</i>       |
|                               |     |     |     |     |     |     |                 |     |     |     |         | ▲   |     |                               | ▲   | ●   | <ul style="list-style-type: none"> <li>Survival</li> </ul>                                                              |
|                               |     |     |     |     |     |     |                 |     |     |     |         | ▲   |     |                               | ▲   | ●   | <ul style="list-style-type: none"> <li>Shell size</li> </ul>                                                            |
|                               |     |     |     |     |     |     |                 |     |     |     |         | ▲   |     |                               | ▲   | ●   | <ul style="list-style-type: none"> <li>Abnormality</li> </ul> Comeau <i>et al.</i> [68]— <i>Cavolinia inflexa</i>       |
|                               |     |     |     |     |     |     |                 |     |     | ▲   |         | ▲   |     |                               |     | ●   | <ul style="list-style-type: none"> <li>Size</li> </ul>                                                                  |
|                               |     |     |     |     |     |     |                 |     |     | ▲   |         |     |     |                               |     | ●   | <ul style="list-style-type: none"> <li>Shape</li> </ul> Ellis <i>et al.</i> [63]— <i>Littorina obtusata</i>             |
|                               |     |     |     |     |     |     |                 |     |     | ▲   |         |     |     |                               |     | ●   | <ul style="list-style-type: none"> <li>Embryo viability, activity and physiology</li> </ul>                             |
|                               |     |     |     |     |     |     |                 |     |     | ▲   |         |     |     |                               |     | ●   | <ul style="list-style-type: none"> <li>Size</li> </ul>                                                                  |
|                               |     |     |     |     |     |     |                 |     |     | ▲   |         |     |     |                               |     | ●   | <ul style="list-style-type: none"> <li>Heart Rate</li> </ul> Gazeau <i>et al.</i> [65]— <i>Mytilus edulis</i>           |
|                               |     |     |     |     |     |     |                 |     |     | ▲   |         |     | ns  |                               | ●   |     | <ul style="list-style-type: none"> <li>Hatching rates</li> </ul>                                                        |
|                               |     |     |     |     |     |     |                 |     |     | ▲   |         |     | ▲   |                               | ●   |     | <ul style="list-style-type: none"> <li>Size at hatching</li> </ul>                                                      |
|                               |     |     |     |     |     |     |                 |     |     | ▲   |         |     | ▲   |                               | ●   |     | <ul style="list-style-type: none"> <li>Size larvae</li> </ul>                                                           |
|                               |     |     |     |     |     |     |                 |     |     | ▲   |         |     | ▲   |                               | ●   |     | <ul style="list-style-type: none"> <li>Shell thickness</li> </ul> Kurihara <i>et al.</i> [33]— <i>Crassostrea gigas</i> |
|                               |     |     |     |     |     |     |                 |     |     | ▲   |         |     |     |                               | ●   | 8.3 | <ul style="list-style-type: none"> <li>Development</li> </ul>                                                           |
|                               |     |     |     |     |     |     |                 |     |     | ▲   |         |     |     |                               | ●   | 8.3 | <ul style="list-style-type: none"> <li>Abnormal</li> </ul>                                                              |
|                               |     |     |     |     |     |     |                 |     |     | ▲   |         |     |     | ns                            | 8.3 | ●   | <ul style="list-style-type: none"> <li>Growth</li> </ul> Kurihara <i>et al.</i> [57]— <i>Mytilus galloprovincialis</i>  |
|                               |     |     |     |     |     |     |                 |     |     | ▲   |         |     |     | ●                             | ●   |     | <ul style="list-style-type: none"> <li>Development</li> </ul>                                                           |

Table S2. Cont.

| Treatment (pH)                |     |     |     |     |     |     |                  |     |     |     |         |     |     | Study- Author/ Species/ Stage |     |     |                                                                                          |
|-------------------------------|-----|-----|-----|-----|-----|-----|------------------|-----|-----|-----|---------|-----|-----|-------------------------------|-----|-----|------------------------------------------------------------------------------------------|
| 6.0                           | 6.5 | 6.8 | 6.9 | 7.0 | 7.1 | 7.2 | 7.3              | 7.4 | 7.5 | 7.6 | 7.7     | 7.8 | 7.9 |                               | 8.0 | 8.1 | 8.2                                                                                      |
| ← Predicted 2300              |     |     |     |     |     |     | ← Predicted 2100 |     |     |     | Control |     |     |                               |     |     |                                                                                          |
| <b>Molluscs (Development)</b> |     |     |     |     |     |     |                  |     |     |     |         |     |     |                               |     |     |                                                                                          |
|                               |     |     |     |     |     |     |                  | ▲   |     |     |         |     |     | ●                             | ●   |     | <ul style="list-style-type: none"> <li>Abnormal—6days</li> </ul>                         |
|                               |     |     |     |     |     |     |                  | ▲   |     |     |         |     |     | ●                             | ●   |     | <ul style="list-style-type: none"> <li>Growth 54hr, 120 hr, 6days</li> </ul>             |
|                               |     |     |     |     |     |     |                  |     |     |     |         |     |     |                               |     |     | Watson <i>et al.</i> [64]— <i>Saccostrea glomerata</i>                                   |
|                               |     |     |     |     |     |     |                  | ▲   |     |     |         |     |     |                               | ●   |     | <ul style="list-style-type: none"> <li>Survival</li> </ul>                               |
|                               |     |     |     |     |     |     |                  | ▲   |     |     |         |     |     |                               | ●   |     | <ul style="list-style-type: none"> <li>Growth &amp; development</li> </ul>               |
|                               |     |     |     |     |     |     |                  | ▲   |     |     |         |     |     |                               | ●   |     | <ul style="list-style-type: none"> <li>Shell abnormality</li> </ul>                      |
|                               |     |     |     |     |     |     |                  |     |     |     |         |     |     |                               |     |     | Parker <i>et al.</i> [35]— <i>Saccostrea glomerata</i>                                   |
|                               |     |     |     |     |     |     |                  |     |     |     |         |     | ▲   | ▲                             | ▲   | ●   | <ul style="list-style-type: none"> <li>Survival</li> </ul>                               |
|                               |     |     |     |     |     |     |                  |     |     |     |         |     | ▲   | ▲                             | ▲   | ●   | <ul style="list-style-type: none"> <li>Growth &amp; development</li> </ul>               |
|                               |     |     |     |     |     |     |                  |     |     |     |         |     | ▲   | ▲                             | ▲   | ●   | <ul style="list-style-type: none"> <li>Abnormality</li> </ul>                            |
|                               |     |     |     |     |     |     |                  |     |     |     |         |     |     |                               |     |     | Parker <i>et al.</i> [39]— <i>Crassostrea gigas</i> (x temperature)                      |
|                               |     |     |     |     |     |     |                  |     |     |     |         |     | ▲   | ▲                             | ▲   | ●   | <ul style="list-style-type: none"> <li>Development—48 hr</li> </ul>                      |
|                               |     |     |     |     |     |     |                  |     |     |     |         |     | ▲   | ▲                             | ▲   | ●   | <ul style="list-style-type: none"> <li>Abnormality</li> </ul>                            |
|                               |     |     |     |     |     |     |                  |     |     |     |         |     | ▲   | ▲                             | ▲   | ●   | <ul style="list-style-type: none"> <li>Size</li> </ul>                                   |
|                               |     |     |     |     |     |     |                  |     |     |     |         |     |     |                               |     |     | Parker <i>et al.</i> [39]— <i>Saccostrea glomerata</i>                                   |
|                               |     |     |     |     |     |     |                  |     |     |     |         |     | ▲   | ▲                             | ▲   | ●   | <ul style="list-style-type: none"> <li>Development—48 hr</li> </ul>                      |
|                               |     |     |     |     |     |     |                  |     |     |     |         |     | ▲   | ▲                             | ▲   | ●   | <ul style="list-style-type: none"> <li>Abnormality</li> </ul>                            |
|                               |     |     |     |     |     |     |                  |     |     |     |         |     | ▲   | ▲                             | ▲   | ●   | <ul style="list-style-type: none"> <li>Size</li> </ul>                                   |
|                               |     |     |     |     |     |     |                  |     |     |     |         |     |     |                               |     |     | Parker <i>et al.</i> [43]— <i>Saccostrea glomerata</i>                                   |
|                               |     |     |     |     |     |     |                  |     |     |     |         |     | ▲   |                               |     | ●   | <ul style="list-style-type: none"> <li>Size of spat- Selected lines &gt; wild</li> </ul> |
|                               |     |     |     |     |     |     |                  |     |     |     |         |     |     |                               |     |     | Parker <i>et al.</i> [59]— <i>Saccostrea glomerata</i>                                   |
|                               |     |     |     |     |     |     |                  |     |     |     |         |     | ▲   |                               |     | ●   | <ul style="list-style-type: none"> <li>Growth</li> </ul>                                 |
|                               |     |     |     |     |     |     |                  |     |     |     |         |     | ▲   |                               |     | ●   | <ul style="list-style-type: none"> <li>Development</li> </ul>                            |

Table S2. Cont.

|                               |     | Treatment (pH)  |     |     |     |     |                 |     |     |     |     |         |     |     |     |     | Study- Author/ Species/ Stage                                                     |
|-------------------------------|-----|-----------------|-----|-----|-----|-----|-----------------|-----|-----|-----|-----|---------|-----|-----|-----|-----|-----------------------------------------------------------------------------------|
| 6.0                           | 6.5 | 6.8             | 6.9 | 7.0 | 7.1 | 7.2 | 7.3             | 7.4 | 7.5 | 7.6 | 7.7 | 7.8     | 7.9 | 8.0 | 8.1 | 8.2 |                                                                                   |
|                               |     | ←Predicted 2300 |     |     |     |     | ←Predicted 2100 |     |     |     |     | Control |     |     |     |     |                                                                                   |
| <b>Molluscs (Development)</b> |     |                 |     |     |     |     |                 |     |     |     |     |         |     |     |     |     |                                                                                   |
|                               |     |                 |     |     |     |     |                 |     |     |     |     |         | ▲   |     |     | ●   | • Survival                                                                        |
|                               |     |                 |     |     |     |     |                 |     |     |     |     |         |     |     |     |     | Miller <i>et al.</i> [124]— <i>Crassostrea ariakensis</i>                         |
|                               |     |                 |     |     |     |     |                 |     |     |     |     | ns      | ns  |     |     | ●   | • Growth                                                                          |
|                               |     |                 |     |     |     |     |                 |     |     |     |     | ns      | ns  |     |     | ●   | • Calcification                                                                   |
|                               |     |                 |     |     |     |     |                 |     |     |     |     |         |     |     |     |     | Miller <i>et al.</i> [124]— <i>Crassostrea virginica</i>                          |
|                               |     |                 |     |     |     |     |                 |     |     |     |     |         | ▲   | ▲   |     | ns  | • Growth                                                                          |
|                               |     |                 |     |     |     |     |                 |     |     |     |     |         | ▲   | ns  |     | ns  | • Calcification                                                                   |
|                               |     |                 |     |     |     |     |                 |     |     |     |     |         |     |     |     |     | Gutowska <i>et al.</i> , [70]— <i>Sepia officinalis</i>                           |
|                               | ns  |                 |     |     | ns  |     |                 |     |     |     |     |         |     |     |     | ●   | • Growth                                                                          |
|                               | ns  |                 |     |     | ns  |     |                 |     |     |     |     |         |     |     |     | ●   | • Metabolic rate                                                                  |
|                               | ++▲ |                 |     |     | ns  |     |                 |     |     |     |     |         |     |     |     | ●   | • Increased calcification                                                         |
|                               |     |                 |     |     |     |     |                 |     |     |     |     |         |     |     |     |     | Gutowska and Melzner [62]— <i>Sepia officinalis</i>                               |
|                               | ●   |                 |     |     |     |     |                 |     |     |     |     |         |     |     |     |     | • pCO <sub>2</sub> in embryos                                                     |
|                               |     |                 |     |     |     |     |                 |     |     |     |     |         |     |     |     |     | Lacoue-Labarthe <i>et al.</i> [71]— <i>Sepia officinalis</i>                      |
|                               |     |                 |     |     |     |     |                 |     |     | ns  |     |         |     |     |     | ●   | • Egg and hatchling weight                                                        |
|                               |     |                 |     |     |     |     |                 |     |     | ++▲ |     |         |     |     |     | ●   | • <sup>110m</sup> Ag uptake                                                       |
|                               |     |                 |     |     |     |     |                 |     |     | ▲   |     |         |     |     |     | ●   | • <sup>109</sup> Cd uptake                                                        |
|                               |     |                 |     |     |     |     |                 |     |     |     |     |         | ▲   |     |     | ●   | • <sup>65</sup> Zn uptake                                                         |
|                               |     |                 |     |     |     |     |                 |     |     |     |     |         |     |     |     |     | Talmage & Gobler [67]— <i>Mercenaria mercenaria</i> & <i>Argopecten irradians</i> |
|                               |     |                 |     |     |     |     |                 |     | ▲   |     |     |         | ▲   |     |     | ●   | • Metamorphosis                                                                   |
|                               |     |                 |     |     |     |     |                 |     | ▲   |     |     |         | ▲   |     |     | ●   | • Growth                                                                          |
|                               |     |                 |     |     |     |     |                 |     | ▲   |     |     |         | ▲   |     |     | ●   | • Survival                                                                        |

Table S2. Cont.

| Treatment (pH)                |     |     |     |     |     |     |                  |     |     |     |         |     | Study- Author/ Species/ Stage |     |     |     |                                                       |
|-------------------------------|-----|-----|-----|-----|-----|-----|------------------|-----|-----|-----|---------|-----|-------------------------------|-----|-----|-----|-------------------------------------------------------|
| 6.0                           | 6.5 | 6.8 | 6.9 | 7.0 | 7.1 | 7.2 | 7.3              | 7.4 | 7.5 | 7.6 | 7.7     | 7.8 |                               | 7.9 | 8.0 | 8.1 | 8.2                                                   |
| ← Predicted 2300              |     |     |     |     |     |     | ← Predicted 2100 |     |     |     | Control |     |                               |     |     |     |                                                       |
| <b>Molluscs (Development)</b> |     |     |     |     |     |     |                  |     |     |     |         |     |                               |     |     |     |                                                       |
|                               |     |     |     |     |     |     |                  | ▲   |     |     |         | ▲   |                               |     |     | ●   | • Shell thickness                                     |
|                               |     |     |     |     |     |     |                  | ▲   |     |     |         | ▲   |                               |     |     | ●   | • Lipid content                                       |
|                               |     |     |     |     |     |     |                  |     |     |     |         |     |                               |     |     |     | Range <i>et al.</i> [69]— <i>Ruditapes decussatus</i> |
|                               |     |     |     |     |     |     |                  | ns  |     |     |         | ns  |                               |     |     | ●   | • Calcification rate                                  |
|                               |     |     |     |     |     |     |                  | ns  |     |     |         | ns  |                               |     |     | ●   | • Size                                                |
|                               |     |     |     |     |     |     |                  | ns  |     |     |         | ns  |                               |     |     | ●   | • Weight                                              |
|                               |     |     |     |     |     |     |                  |     |     |     |         |     |                               |     |     |     | Waldbusser <i>et al.</i> [44]— <i>Mercenaria spp.</i> |
|                               |     |     |     |     |     |     |                  | ▲   |     |     |         |     |                               |     |     | ●   | • Size dependency of calcification rate               |
|                               |     |     |     |     |     |     |                  | ▲   | ▲   |     |         |     |                               |     |     | ●   | • Calcification                                       |
|                               |     |     |     |     |     |     |                  |     |     |     |         |     |                               |     |     |     | Lischka <i>et al.</i> [66]— <i>Limacina helicina</i>  |
|                               |     |     |     |     |     |     |                  | ▲   |     |     |         | ns  |                               |     |     | ●   | • Shell increment: diameter                           |
|                               |     |     |     |     |     |     |                  | ▲   |     |     |         | △   |                               |     |     | ●   | • Shell increment                                     |
|                               |     |     |     |     |     |     |                  | ▲   |     |     |         | ▲   |                               |     |     | ●   | • Shell degradation                                   |
|                               |     |     |     |     |     |     |                  | ▲   |     |     |         | ns  |                               |     |     | ●   | • Mortality                                           |

Table S2. Cont.

| Treatment (pH)                     |     |     |     |     |     |     |                 |     |     |         |     |     | Study- Author/ Species/ Stage |     |     |     |                                                                   |
|------------------------------------|-----|-----|-----|-----|-----|-----|-----------------|-----|-----|---------|-----|-----|-------------------------------|-----|-----|-----|-------------------------------------------------------------------|
| 6.0                                | 6.5 | 6.8 | 6.9 | 7.0 | 7.1 | 7.2 | 7.3             | 7.4 | 7.5 | 7.6     | 7.7 | 7.8 |                               | 7.9 | 8.0 | 8.1 | 8.2                                                               |
| ←Predicted 2300                    |     |     |     |     |     |     | ←Predicted 2100 |     |     | Control |     |     |                               |     |     |     |                                                                   |
| <b>Echinoderms (Fertilisation)</b> |     |     |     |     |     |     |                 |     |     |         |     |     |                               |     |     |     |                                                                   |
|                                    |     | ▲   |     | △   |     |     |                 | △   |     | ns      |     |     |                               |     | ●   |     | Kurihara and Shirayama [52], Kurihara <i>et al.</i> [53]          |
|                                    |     | ▲   |     |     | ▲   |     | △△              |     |     |         | ns  | ns  |                               |     |     | ●   | • <i>Hemicentrotus pulcherrimus</i>                               |
|                                    |     |     |     |     |     |     |                 |     |     |         |     |     |                               |     |     |     | Havenhand <i>et al.</i> [56]— <i>Heliocidaris erythrogramma</i>   |
|                                    |     |     |     |     |     |     |                 |     |     |         | ▲   |     |                               |     |     | ●   | • Fertilisation success                                           |
|                                    |     |     |     |     |     |     |                 |     |     |         | ▲   |     |                               |     |     | ●   | • Sperm speed                                                     |
|                                    |     |     |     |     |     |     |                 |     |     |         | ▲   |     |                               |     |     | ●   | • Sperm motility                                                  |
|                                    |     |     |     |     |     |     |                 |     | △   |         |     | ns  | ns                            |     |     | ●   | Byrne <i>et al.</i> [34]— <i>Heliocidaris erythrogramma</i>       |
|                                    |     |     |     |     |     |     |                 |     | ns  |         |     | ns  |                               |     |     | ●   | Byrne <i>et al.</i> [47]- <i>Heliocidaris erythrogramma</i>       |
|                                    |     |     |     |     |     |     |                 |     |     |         |     |     |                               |     |     |     | Byrne <i>et al.</i> [48]                                          |
|                                    |     |     |     |     |     |     |                 |     |     |         |     | ns  | ns                            |     |     | ●   | <i>Heliocidaris erythrogramma</i>                                 |
|                                    |     |     |     |     |     |     |                 |     | △   |         |     | ns  | ns                            |     |     | ●   | <i>H.tuberculata</i> —(Little Bay)                                |
|                                    |     |     |     |     |     |     |                 |     |     |         |     | ns  | ns                            |     |     | ●   | <i>Tripneustes gratila</i> —(Coffs Harbour)                       |
|                                    |     |     |     |     |     |     |                 |     |     |         |     | ns  | ns                            |     |     | ●   | <i>Centrostephanus rodgersii</i> (Little Bay)                     |
|                                    |     |     |     |     |     |     |                 |     |     |         |     | ns  | ns                            |     |     | ●   | <i>Patiriella regularis</i> (Hobart)                              |
|                                    |     |     |     |     |     |     |                 |     |     |         |     |     |                               |     |     |     | Reuter <i>et al.</i> [55]— <i>Strongylocentrotus franciscanus</i> |
|                                    |     |     |     |     |     |     |                 |     |     |         |     |     | ▲                             |     |     | ●   | • Fertilisation efficiency                                        |
|                                    |     |     |     |     |     |     |                 |     |     |         |     |     | ▲                             |     |     | ●   | • Time of egg block to polyspermy                                 |
|                                    |     |     |     |     |     |     |                 |     |     |         |     |     | ns                            |     |     | ●   | Moulin <i>et al.</i> [42]— <i>Paracentrotus lividus</i>           |
|                                    |     | ▲   |     | ▲   |     | ▲   |                 | ▲   |     | ▲       |     |     | ns                            |     |     | ●   | • Fertilisation rate                                              |
|                                    |     |     |     |     |     |     |                 |     |     |         |     |     |                               |     |     |     | Ericson <i>et al.</i> [54]— <i>Sterechinus neumayeri</i>          |
|                                    |     |     |     |     | ns  |     |                 |     |     |         | ns  |     |                               |     |     | ●   | • Optimal or above optimal sperm                                  |
|                                    |     |     |     | ▲   |     |     | ns              |     |     |         | ns  |     |                               |     |     | ●   | • Suboptimal sperm                                                |



Table S2. Cont.

| Treatment (pH)                  |     |     |     |     |     |                  |     |     |     |     |         |     | Study- Author/ Species/ Stage |     |     |     |                                                               |
|---------------------------------|-----|-----|-----|-----|-----|------------------|-----|-----|-----|-----|---------|-----|-------------------------------|-----|-----|-----|---------------------------------------------------------------|
| 6.0                             | 6.5 | 6.8 | 6.9 | 7.0 | 7.1 | 7.2              | 7.3 | 7.4 | 7.5 | 7.6 | 7.7     | 7.8 |                               | 7.9 | 8.0 | 8.1 | 8.2                                                           |
| ← Predicted 2300                |     |     |     |     |     | ← Predicted 2100 |     |     |     |     | Control |     |                               |     |     |     |                                                               |
| <b>Molluscs (Fertilisation)</b> |     |     |     |     |     |                  |     |     |     |     |         |     |                               |     |     |     |                                                               |
|                                 |     |     |     |     |     | ns               |     |     |     |     |         |     |                               | ●   | ●   |     | Kurihara <i>et al.</i> [57]— <i>Mytilus galloprovincialis</i> |
|                                 |     |     |     |     |     |                  |     |     |     |     |         |     |                               |     | ●   |     | Havenhand and Schlegel [49]— <i>Crassostrea gigas</i>         |
|                                 |     |     |     |     |     |                  |     |     |     |     |         | ns  |                               |     | ●   |     | • Swimming speed                                              |
|                                 |     |     |     |     |     |                  |     |     |     |     |         | ns  |                               |     | ●   |     | • Motility                                                    |
|                                 |     |     |     |     |     |                  |     |     |     |     |         |     |                               |     |     |     | Parker <i>et al.</i> [35,39]                                  |
|                                 |     |     |     |     |     |                  |     |     |     |     |         | ▲   | ▲                             | ▲   | ●   |     | <i>Crassostrea gigas</i>                                      |
|                                 |     |     |     |     |     |                  |     |     |     |     |         | ▲   | ▲                             | ▲   | ●   |     | <i>Saccostrea glomerata</i>                                   |
|                                 |     |     |     |     |     |                  |     |     |     | ns  |         | ns  | ns                            |     | ●   |     | Byrne <i>et al.</i> [48]— <i>Haliotis coccoradiata</i>        |
| <b>Crustaceans (Decapods)</b>   |     |     |     |     |     |                  |     |     |     |     |         |     |                               |     |     |     |                                                               |
|                                 |     |     |     |     |     |                  |     |     |     |     |         |     |                               |     |     |     | Kurihara <i>et al.</i> [87]— <i>Palaemon pacificus</i>        |
|                                 |     |     |     |     |     |                  |     |     |     |     |         |     |                               |     | ●   |     | Survival adults 15–30 weeks                                   |
|                                 |     |     |     |     |     |                  |     |     |     |     |         |     |                               |     | ●   |     | Growth 15–30 weeks                                            |
|                                 |     |     |     |     |     |                  |     |     |     |     |         |     |                               |     | ●   |     | Feeding 15–30 weeks                                           |
|                                 |     |     |     |     |     |                  |     |     |     |     |         |     |                               |     | ●   |     | Moulting 15–30 weeks                                          |
|                                 |     |     |     |     |     |                  |     |     |     |     |         |     |                               |     | ●   |     | 2nd antennae length                                           |
|                                 |     |     |     |     |     |                  |     |     |     |     |         |     |                               |     | ●   |     | Oxygen consumption 15–30 weeks                                |
|                                 |     |     |     |     |     |                  |     |     |     |     |         |     |                               |     | ●   |     | Egg production                                                |
|                                 |     |     |     |     |     |                  |     |     |     |     |         |     |                               |     |     |     | Arnold <i>et al.</i> [92]— <i>Homarus gammarus</i>            |

Table S2. Cont.

| Treatment (pH)                 |     |     |     |     |     |     |                 |     |     |         |     |     | Study- Author/ Species/ Stage |       |                                                                   |
|--------------------------------|-----|-----|-----|-----|-----|-----|-----------------|-----|-----|---------|-----|-----|-------------------------------|-------|-------------------------------------------------------------------|
| 6.0                            | 6.5 | 6.8 | 6.9 | 7.0 | 7.1 | 7.2 | 7.3             | 7.4 | 7.5 | 7.7     | 7.8 | 8.0 |                               | 8.1   | 8.2                                                               |
| ←Predicted 2300                |     |     |     |     |     |     | ←Predicted 2100 |     |     | Control |     |     |                               |       |                                                                   |
| <b>Crustaceans (Decapods)</b>  |     |     |     |     |     |     |                 |     |     |         |     |     |                               |       |                                                                   |
|                                |     |     |     |     |     |     |                 |     |     |         |     |     | ns                            | 8.4 ● | • Length                                                          |
|                                |     |     |     |     |     |     |                 |     |     |         |     |     | ▲                             | 8.4 ● | • Mass                                                            |
|                                |     |     |     |     |     |     |                 |     |     |         |     |     | ▲                             | 8.4 ● | • Ca/Mg                                                           |
|                                |     |     |     |     |     |     |                 |     |     |         |     |     |                               |       | Walther <i>et al.</i> [93]— <i>Hyas araneus</i>                   |
|                                |     |     |     |     |     |     | ▲               |     |     |         |     |     |                               | ●     | • Development delay                                               |
|                                |     |     |     |     |     |     | ▲               |     |     |         |     |     |                               | ●     | • Growth                                                          |
|                                |     |     |     |     |     |     | ▲               |     |     |         |     |     |                               | ●     | • Fitness                                                         |
|                                |     |     |     |     |     |     |                 |     |     |         |     |     |                               |       | Walther <i>et al.</i> [97]— <i>Hyas araneus</i> x temp x latitude |
|                                |     |     |     |     |     |     | ▲               |     |     |         |     |     |                               | ●     | • Calcification                                                   |
|                                |     |     |     |     |     |     |                 |     |     | ns      |     |     |                               |       |                                                                   |
| <b>(Crustaceans) Amphipods</b> |     |     |     |     |     |     |                 |     |     |         |     |     |                               |       |                                                                   |
|                                |     |     |     |     |     |     |                 |     |     |         |     |     |                               |       | Egilsdottir <i>et al.</i> [94]— <i>Echinogammarus marinus</i>     |
|                                |     |     |     |     |     |     |                 |     |     |         |     |     |                               | ●     | • Oxygen uptake post-brooding females                             |
|                                |     |     |     |     |     |     | ns              |     |     |         |     |     |                               | ●     | • Number of hatchlings                                            |
|                                |     |     |     |     |     |     | ns              |     |     |         |     |     |                               | ●     | • Total Ca content                                                |
|                                |     |     |     |     |     |     | ▲               |     |     |         |     |     |                               | ●     | • Developmental time only with lowered salinity                   |
|                                |     |     |     |     |     |     |                 |     |     |         |     |     |                               |       | Hauton <i>et al.</i> [88]— <i>Gammarus locusta</i>                |
|                                |     |     |     |     |     |     | ns              |     | △   |         |     |     |                               | ●     | • Survival 28–30 days                                             |
|                                |     |     |     |     |     |     | ns              |     | ns  |         |     |     |                               | ●     | • Growth 28–30 days                                               |
|                                |     |     |     |     |     |     | ++▲▲            |     | ns  |         |     |     |                               | ●     | • Gene expression <i>gapdh</i> gene 28–30 days                    |

Table S2. Cont.

| Treatment (pH)                                                 |     |     |     |     |     |     |                 |     |     |                 |     |     |         | Study- Author/ Species/ Stage |     |     |                                                |
|----------------------------------------------------------------|-----|-----|-----|-----|-----|-----|-----------------|-----|-----|-----------------|-----|-----|---------|-------------------------------|-----|-----|------------------------------------------------|
| 6.0                                                            | 6.5 | 6.8 | 6.9 | 7.0 | 7.1 | 7.2 | 7.3             | 7.4 | 7.5 | 7.6             | 7.7 | 7.8 | 7.9     |                               | 8.0 | 8.1 | 8.2                                            |
|                                                                |     |     |     |     |     |     | ←Predicted 2300 |     |     | ←Predicted 2100 |     |     | Control |                               |     |     |                                                |
| <b>Corals</b>                                                  |     |     |     |     |     |     |                 |     |     |                 |     |     |         |                               |     |     |                                                |
| Suwa <i>et al.</i> [98]                                        |     |     |     |     |     |     |                 |     |     |                 |     |     |         |                               |     |     |                                                |
| ▲                                                              |     |     |     |     |     |     | ▲               |     |     |                 |     |     |         |                               |     | ●   | ● Planula survival— <i>Acropora tenuis</i>     |
| ns                                                             |     |     |     |     |     |     | ns              |     |     |                 |     |     |         |                               |     | ●   | ● Planula survival— <i>Acropora digitifera</i> |
| ▲                                                              |     |     |     |     |     |     | △               |     |     |                 |     |     |         |                               |     |     | ● Polyp size— <i>Acropora digitifera</i>       |
| ▲                                                              |     |     |     |     |     |     | △               |     |     |                 |     |     |         |                               |     |     | ● Algal infection— <i>Acropora digitifera</i>  |
| Jokiel <i>et al.</i> [125]                                     |     |     |     |     |     |     |                 |     |     |                 |     |     |         |                               |     |     |                                                |
|                                                                |     |     |     |     |     |     |                 |     |     |                 | ns  | ns  |         |                               |     | ●   | ● Recruitment— <i>Pocillopora damicornis</i>   |
|                                                                |     |     |     |     |     |     |                 |     |     |                 | ns  | ns  |         |                               |     | ●   | ● Gametes—6 months <i>Montipora capitata</i>   |
| Anlauf <i>et al.</i> [99]— <i>Porites panamensis</i>           |     |     |     |     |     |     |                 |     |     |                 |     |     |         |                               |     |     |                                                |
|                                                                |     |     |     |     |     |     |                 |     |     |                 | ns  |     |         |                               |     | ●   | ● Survival                                     |
|                                                                |     |     |     |     |     |     |                 |     |     |                 | ns  |     |         |                               |     | ●   | ● Settlement                                   |
| Morita <i>et al.</i> [126]— <i>Acropora digitifera</i> (coral) |     |     |     |     |     |     |                 |     |     |                 |     |     |         |                               |     |     |                                                |
| ▲                                                              |     |     |     |     |     |     | ▲               | ▲   | ▲   | ▲               |     |     |         |                               |     | ●   | ● Sperm motility                               |
| Albright <i>et al.</i> [58]— <i>Acropora palmate</i>           |     |     |     |     |     |     |                 |     |     |                 |     |     |         |                               |     |     |                                                |
|                                                                |     |     |     |     |     |     |                 |     |     | ▲               | ▲   | ●   |         |                               |     |     | ● Fertilisation                                |
|                                                                |     |     |     |     |     |     |                 |     |     | ▲               | ▲   | ●   |         |                               |     |     | ● Settlement                                   |
|                                                                |     |     |     |     |     |     |                 |     |     | ▲               | ▲   | ●   |         |                               |     |     | ● Post-settlement growth                       |
| Albright <i>et al.</i> [100]— <i>Porites astreoides</i>        |     |     |     |     |     |     |                 |     |     |                 |     |     |         |                               |     |     |                                                |
|                                                                |     |     |     |     |     |     |                 |     |     | ▲               | ▲   | ●   |         |                               |     |     | ● Metabolism                                   |
|                                                                |     |     |     |     |     |     |                 |     |     | ▲               | ▲   | ●   |         |                               |     |     | ● Settlement                                   |
|                                                                |     |     |     |     |     |     |                 |     |     | ▲               | ▲   | ●   |         |                               |     |     | ● Post-settlement growth                       |
| Holcomb <i>et al.</i> [127]— <i>Astrangia poculata</i>         |     |     |     |     |     |     |                 |     |     |                 |     |     |         |                               |     |     |                                                |

Table S2. Cont.

|                        |  | Treatment (pH) |     |     |     |     |     |     |     |     |     |     |     |     |     |     |     | Study- Author/ Species/ Stage |                      |                      |         |   |  |  |   |   |                                                                                                               |
|------------------------|--|----------------|-----|-----|-----|-----|-----|-----|-----|-----|-----|-----|-----|-----|-----|-----|-----|-------------------------------|----------------------|----------------------|---------|---|--|--|---|---|---------------------------------------------------------------------------------------------------------------|
|                        |  | 6.0            | 6.5 | 6.8 | 6.9 | 7.0 | 7.1 | 7.2 | 7.3 | 7.4 | 7.5 | 7.6 | 7.7 | 7.8 | 7.9 | 8.0 | 8.1 | 8.2                           | ←Predicted<br>d 2300 | ←Predicted<br>d 2100 | Control |   |  |  |   |   |                                                                                                               |
| <b>Corals</b>          |  |                |     |     |     |     |     |     |     |     |     |     |     |     |     |     |     |                               |                      |                      |         |   |  |  |   |   |                                                                                                               |
| ▲<br>▲<br>++▲<br>++▲   |  |                |     |     |     |     |     |     |     |     |     |     |     |     |     |     |     |                               |                      | ▲                    |         | ● |  |  |   |   | • Calcification<br>Krief <i>et al.</i> [128]— <i>Stylophora pistillata</i> &<br><i>Porites sp.</i>            |
|                        |  |                |     |     |     |     |     |     |     |     |     |     |     |     |     |     |     |                               |                      |                      |         |   |  |  |   | ● | • Skeletal growth                                                                                             |
|                        |  |                |     |     |     |     |     |     |     |     |     |     |     |     |     |     |     |                               |                      |                      |         |   |  |  |   | ● | • Zooxanthellae density                                                                                       |
|                        |  |                |     |     |     |     |     |     |     |     |     |     |     |     |     |     |     |                               |                      |                      |         |   |  |  |   | ● | • Biomass                                                                                                     |
|                        |  |                |     |     |     |     |     |     |     |     |     |     |     |     |     |     |     |                               |                      |                      |         |   |  |  |   | ● | • Zooxanthellae chlorophyll concentration<br>Rodolfo-Metalpa <i>et al.</i> [129]— <i>Cladocera caespitose</i> |
|                        |  |                |     |     |     |     |     |     |     |     |     |     |     | ns  | ns  |     |     |                               |                      |                      |         |   |  |  | ● |   | • Calcification                                                                                               |
| <b>Coralline Algae</b> |  |                |     |     |     |     |     |     |     |     |     |     |     |     |     |     |     |                               |                      |                      |         |   |  |  |   |   |                                                                                                               |
|                        |  |                |     |     |     |     |     |     |     |     |     |     |     |     |     |     |     |                               |                      |                      |         |   |  |  |   |   | Martin & Gattuso. [116]— <i>Lithophyllum cabiochate</i>                                                       |
|                        |  |                |     |     |     |     |     |     |     |     |     |     |     |     |     |     |     |                               |                      | ▲                    |         | ● |  |  |   |   | • Mortality (algal necroses)                                                                                  |
|                        |  |                |     |     |     |     |     |     |     |     |     |     |     |     |     |     |     |                               |                      | ▲                    |         | ● |  |  |   |   | • Net calcification (temp & CO <sub>2</sub> )                                                                 |
|                        |  |                |     |     |     |     |     |     |     |     |     |     |     |     |     |     |     |                               |                      | ++▲                  |         | ● |  |  |   |   | • Dissolution of algal thalli                                                                                 |

Table S2. Cont.

| Treatment (pH)         |     |     |     |     |     |     |                 |     |     |                 |     |     | Study- Author/ Species/ Stage |     |     |     |                                                       |
|------------------------|-----|-----|-----|-----|-----|-----|-----------------|-----|-----|-----------------|-----|-----|-------------------------------|-----|-----|-----|-------------------------------------------------------|
| 6.0                    | 6.5 | 6.8 | 6.9 | 7.0 | 7.1 | 7.2 | 7.3             | 7.4 | 7.5 | 7.6             | 7.7 | 7.8 |                               | 7.9 | 8.0 | 8.1 | 8.2                                                   |
|                        |     |     |     |     |     |     | ←Predicted 2300 |     |     | ←Predicted 2100 |     |     | Control                       |     |     |     |                                                       |
| (Crustaceans) Copepods |     |     |     |     |     |     |                 |     |     |                 |     |     |                               |     |     |     |                                                       |
|                        |     | ns  |     |     |     |     | ns              |     |     |                 |     |     |                               |     | ●   |     | Kurihara <i>et al.</i> [53,86]                        |
|                        |     |     |     |     |     |     |                 |     |     |                 |     |     |                               |     | ●   |     | • Adults survival— <i>Acartia steuerei</i>            |
|                        |     | ▲   |     |     |     |     | ns              |     |     |                 |     |     |                               |     | ●   |     | • Adult survival— <i>Acartia erythraea</i>            |
|                        |     | ▲   |     |     | △   |     |                 |     |     |                 |     |     |                               |     | ●   |     | • Egg production— <i>Acartia steuerei</i>             |
|                        |     | ▲   |     |     | ns  |     | ns              |     |     |                 |     |     |                               |     | ●   |     | • Egg production— <i>Acartia erythraea</i>            |
|                        |     | ▲   |     | ▲   |     |     | ns              |     |     |                 |     |     |                               |     | ●   |     | • Hatching rate— <i>Acartia erythraea</i>             |
|                        |     |     |     |     |     |     |                 |     |     |                 |     |     |                               |     |     |     | • Mortality— <i>Acartia erythraea</i>                 |
|                        |     |     |     |     |     |     | ns              |     |     |                 |     |     |                               |     | ●   |     | Kurihara & Ishimatsu [50]— <i>Acartia tsuensis</i>    |
|                        |     |     |     |     |     |     | ns              |     |     |                 |     |     |                               |     | ●   |     | • Survival                                            |
|                        |     |     |     |     |     |     | ns              |     |     |                 |     |     |                               |     | ●   |     | • Development and Promosome length                    |
|                        |     |     |     |     |     |     | ns              |     |     |                 |     |     |                               |     | ●   |     | • Egg production 2 generations                        |
|                        |     |     |     |     |     |     | ns              |     |     |                 |     |     |                               |     | ●   |     | • Hatching 2 generations                              |
|                        |     | ns  |     |     |     |     |                 |     |     |                 |     |     |                               |     | ●   |     | Mayor <i>et al.</i> [95]— <i>Calanus finmarchicus</i> |
|                        |     | ns  |     |     |     |     |                 |     |     |                 |     |     |                               |     | ●   |     | • Adult Biomass C/N ratio                             |
|                        |     | ns  |     |     |     |     |                 |     |     |                 |     |     |                               |     | ●   |     | • Egg production                                      |
|                        |     | ▲   |     |     |     |     |                 |     |     |                 |     |     |                               |     | ●   |     | • Produced nauplii                                    |
|                        |     | ▲   |     |     |     |     |                 |     |     |                 |     |     |                               |     | ●   |     | • Remained unhatched                                  |
|                        |     | ▲   |     |     |     |     |                 |     |     |                 |     |     |                               |     | ●   |     | • Disintegrated                                       |

Table S2. Cont.

| Treatment (pH)                 |     |     |     |     |     |     |                 |     |     |     |         |     |     | Study- Author/ Species/ Stage |     |     |                                                                                                   |
|--------------------------------|-----|-----|-----|-----|-----|-----|-----------------|-----|-----|-----|---------|-----|-----|-------------------------------|-----|-----|---------------------------------------------------------------------------------------------------|
| 6.0                            | 6.5 | 6.8 | 6.9 | 7.0 | 7.1 | 7.2 | 7.3             | 7.4 | 7.5 | 7.6 | 7.7     | 7.8 | 7.9 |                               | 8.0 | 8.1 | 8.2                                                                                               |
| ←Predicted 2300                |     |     |     |     |     |     | ←Predicted 2100 |     |     |     | Control |     |     |                               |     |     |                                                                                                   |
| <b>(Crustaceans) Barnacles</b> |     |     |     |     |     |     |                 |     |     |     |         |     |     |                               |     |     |                                                                                                   |
|                                |     |     |     |     |     |     |                 |     |     |     |         |     |     |                               |     |     | McDonald <i>et al.</i> [91]— <i>Amphibalanus amphitrite</i>                                       |
|                                | ns  |     |     |     |     |     |                 |     |     |     |         |     |     |                               |     |     | • Cyprid size 96–120 hr                                                                           |
|                                | ns  |     |     |     |     |     |                 |     |     |     |         |     |     |                               |     |     | • Nauplii survival to attachment & metamorphosis                                                  |
|                                | △   |     |     |     |     |     |                 |     |     |     |         |     |     |                               |     |     | • Juvenile to adult growth 8 weeks                                                                |
|                                | ns  |     |     |     |     |     |                 |     |     |     |         |     |     |                               |     |     | • Egg production 11 weeks post settlement                                                         |
|                                | ▲   |     |     |     |     |     |                 |     |     |     |         |     |     |                               |     |     | • Adult Adhesion                                                                                  |
|                                | ▲   |     |     |     |     |     |                 |     |     |     |         |     |     |                               |     |     | • Basal plate ash weight of CaCO <sub>3</sub>                                                     |
|                                | ▲   |     |     |     |     |     |                 |     |     |     |         |     |     |                               |     |     | • Wall shell penetrometry                                                                         |
|                                |     |     |     |     |     |     |                 |     |     |     |         |     |     |                               |     |     | Findlay <i>et al.</i> [96]— <i>Semibalanus balanoides</i>                                         |
|                                |     |     |     |     |     |     | ▲               |     |     |     |         |     |     | •                             |     |     | • Adult survival 104 days                                                                         |
|                                |     |     |     |     |     |     | ▲               |     |     |     |         |     |     | •                             |     |     | • Adult shell mineralogy                                                                          |
|                                |     |     |     |     |     |     | ▲               |     |     |     |         |     |     | •                             |     |     | • Hatching                                                                                        |
|                                |     |     |     |     |     |     | ▲               |     |     |     |         |     |     | •                             |     |     | • Developmental Rate                                                                              |
|                                |     |     |     |     |     |     |                 |     |     |     |         |     |     |                               |     |     | Findlay <i>et al.</i> [90]—2 barnacles <i>Semibalanus balanoides</i> and <i>Elminius modestus</i> |
|                                |     |     |     |     |     |     | ns              |     |     |     |         |     |     | •                             |     |     | • Calcium content— <i>S. balanoides</i> & <i>E. modestus</i>                                      |
|                                |     |     |     |     |     |     | ns              |     |     |     |         |     |     | •                             |     |     | • Survival— <i>S. balanoides</i> & <i>E. modestus</i>                                             |
|                                |     |     |     |     |     |     | ns              |     |     |     |         |     |     | •                             |     |     | • Growth— <i>S. balanoides</i>                                                                    |
|                                |     |     |     |     |     |     | ▲               |     |     |     |         |     |     | •                             |     |     | • Growth— <i>E. modestus</i>                                                                      |
|                                |     |     |     |     |     |     |                 |     |     |     |         |     |     |                               |     |     | Findlay <i>et al.</i> [89]— <i>Semibalanus balanoides</i>                                         |
|                                | ▲   |     |     |     |     |     | ▲               |     |     |     |         |     |     | •                             |     |     | • Growth & development                                                                            |
|                                | ns  |     |     |     |     |     | ns              |     |     |     |         |     |     | •                             |     |     | • Mineral composition of shell                                                                    |
|                                | ns  |     |     |     |     |     | ns              |     |     |     |         |     |     | •                             |     |     | • Survival                                                                                        |

Table S2. Cont.

| 6.0         |  | 6.5 |  | 6.8 | 6.9 | 7.0 | 7.1 | Treatment (pH)  |     |     |     |     |                 |     |     |         |     | Study- Author/ Species/ Stage |     |                                                                |
|-------------|--|-----|--|-----|-----|-----|-----|-----------------|-----|-----|-----|-----|-----------------|-----|-----|---------|-----|-------------------------------|-----|----------------------------------------------------------------|
|             |  |     |  |     |     |     |     | 7.2             | 7.3 | 7.4 | 7.5 | 7.6 | 7.7             | 7.8 | 7.9 | 8.0     | 8.1 |                               | 8.2 |                                                                |
|             |  |     |  |     |     |     |     | ←Predicted 2300 |     |     |     |     | ←Predicted 2100 |     |     | Control |     |                               |     |                                                                |
| <b>Fish</b> |  |     |  |     |     |     |     |                 |     |     |     |     |                 |     |     |         |     |                               |     |                                                                |
|             |  |     |  |     |     |     |     |                 |     |     |     |     |                 |     |     |         |     |                               |     | Munday <i>et al.</i> [102]— <i>Amphiprion percula</i>          |
|             |  |     |  |     |     |     |     |                 |     |     |     |     | ▲               |     |     |         |     |                               |     | • Olfactory Response Settlement                                |
|             |  |     |  |     |     |     |     |                 |     |     |     |     | ns              |     |     |         |     |                               |     | • Morphology, Swimming, Feeding, Nasal cavity                  |
|             |  |     |  |     |     |     |     |                 |     |     |     |     |                 |     |     |         |     |                               |     | Munday <i>et al.</i> [103]— <i>Amphiprion percula</i>          |
|             |  |     |  |     |     |     |     |                 |     |     |     |     |                 |     |     |         |     |                               |     | • Embryonic duration                                           |
|             |  |     |  |     |     |     |     |                 |     |     |     |     |                 |     |     |         |     |                               |     | • Egg survival                                                 |
|             |  |     |  |     |     |     |     |                 |     |     |     |     |                 |     |     |         |     |                               |     | • Size at hatching                                             |
|             |  |     |  |     |     |     |     |                 |     |     |     |     |                 |     |     |         |     |                               |     | • Energy (yolk sac)                                            |
|             |  |     |  |     |     |     |     |                 |     |     |     |     |                 |     |     |         |     |                               |     | • Swimming speed                                               |
|             |  |     |  |     |     |     |     |                 |     |     |     |     |                 |     |     |         |     |                               |     | • Newly hatched larvae, length, weight                         |
|             |  |     |  |     |     |     |     |                 |     |     |     |     |                 |     |     |         |     |                               |     | Munday <i>et al.</i> [104]— <i>Amphiprion percula</i>          |
|             |  |     |  |     |     |     |     |                 |     |     |     |     |                 |     |     |         |     |                               |     | • Embryonic duration, egg survival, size at hatching           |
|             |  |     |  |     |     |     |     |                 |     |     |     |     |                 |     |     |         |     |                               |     | • Growth rate                                                  |
|             |  |     |  |     |     |     |     |                 |     |     |     |     |                 |     |     |         |     |                               |     | • Swimming speed                                               |
|             |  |     |  |     |     |     |     |                 |     |     |     |     |                 |     |     |         |     |                               |     | Munday <i>et al.</i> [105]— <i>Acanthochromis polyacanthus</i> |

Table S2. Cont.

| 6.0         |  | 6.5 |  | 6.8 | 6.9 | 7.0 | 7.1 | Treatment (pH)   |  |  |  |  |                  |  |  |         |   | Study- Author/ Species/ Stage                                           |
|-------------|--|-----|--|-----|-----|-----|-----|------------------|--|--|--|--|------------------|--|--|---------|---|-------------------------------------------------------------------------|
|             |  |     |  |     |     |     |     | ← Predicted 2300 |  |  |  |  | ← Predicted 2100 |  |  | Control |   |                                                                         |
|             |  |     |  |     |     |     |     |                  |  |  |  |  |                  |  |  |         |   |                                                                         |
| <b>Fish</b> |  |     |  |     |     |     |     |                  |  |  |  |  |                  |  |  |         |   |                                                                         |
|             |  |     |  |     |     |     |     |                  |  |  |  |  |                  |  |  |         | ● | • Size, shape, symmetry of otoliths                                     |
|             |  |     |  |     |     |     |     |                  |  |  |  |  |                  |  |  |         | ● | • Growth, survival                                                      |
|             |  |     |  |     |     |     |     |                  |  |  |  |  |                  |  |  |         | ● | Munday <i>et al.</i> [106]— <i>Amphiprion percula</i>                   |
|             |  |     |  |     |     |     |     |                  |  |  |  |  |                  |  |  |         | ● | • Otolith area, maximum length                                          |
|             |  |     |  |     |     |     |     |                  |  |  |  |  |                  |  |  |         | ● | • Symmetry and Otolith Chemistry                                        |
|             |  |     |  |     |     |     |     |                  |  |  |  |  |                  |  |  |         |   | Frommel <i>et al.</i> [51]— <i>Gadhus morhua</i>                        |
|             |  |     |  |     |     |     |     |                  |  |  |  |  |                  |  |  |         | ● | • Sperm speed                                                           |
|             |  |     |  |     |     |     |     |                  |  |  |  |  |                  |  |  |         | ● | • Sperm motility                                                        |
|             |  |     |  |     |     |     |     |                  |  |  |  |  |                  |  |  |         | ● | • Sperm rate of change in direction                                     |
|             |  |     |  |     |     |     |     |                  |  |  |  |  |                  |  |  |         |   | Kikkawa <i>et al.</i> [101]— <i>Pagrus major &amp; Sillago japonica</i> |
|             |  |     |  |     |     |     |     |                  |  |  |  |  |                  |  |  |         | ● | • Hatching                                                              |
|             |  |     |  |     |     |     |     |                  |  |  |  |  |                  |  |  |         | ● | • Survival                                                              |

Key to symbols: ● Control; ns Not significant; Δ Trend decreasing with pH; ▲ Significant decrease with pH; ++▲ Significant increase with pH.
